# Supplementary material for: Unprecedented binding and activation of CS2 in a dinuclear copper(i) complex
Source: Royal Society of Chemistry journal article supplement (doi:10.1039/c1cc11518a), 2011-01-01
Supplement: c1cc11518a.pdf [file c1cc11518a.pdf]

Supporting Information

For

# Unprecedented Binding and Activation of CS<sub>2</sub> in a Dinuclear Copper(I) Complex

*Peter Haack, Christian Limberg\*, Thomas Tietz, Ramona Metzinger*

Humboldt-Universität zu Berlin, Institut für Chemie, Brook-Taylor-Str. 2, 12489 Berlin,  
Germany

E-mail [Christian.limberg@chemie.hu-berlin.de](mailto:Christian.limberg@chemie.hu-berlin.de)

## Table of Contents

|                                             |       |
|---------------------------------------------|-------|
| Experimental Section - General Procedures   | S2    |
| X-ray Crystallographic Data                 | S2-S3 |
| Details on Density Functional Calculations. | S3    |
| Geometry Optimisation Data                  | S4    |
| NBO Analysis                                | S5    |

**Experimental Section - General Procedures.** All manipulations were carried out in a glove-box, or else by means of Schlenk-type techniques involving the use of a dry argon atmosphere. The  $^1\text{H}$  and  $^{13}\text{C}$  NMR spectra were recorded on a Bruker DPX 300 NMR spectrometer ( $^1\text{H}$  300.1 MHz,  $^{13}\text{C}$  75.5 MHz) with  $\text{CH}_2\text{Cl}_2$  as solvent at 20°C. The  $^1\text{H}$  NMR spectra were calibrated against the residual proton, the  $^{13}\text{C}$  NMR spectra against natural abundance  $^{13}\text{C}$  resonances of the deuterated solvents ( $\text{CD}_2\text{Cl}_2$   $\delta_{\text{H}}$  5.32 ppm and  $\delta_{\text{C}}$  53.5 ppm). Microanalyses were performed on a Leco CHNS-932 elemental analyser. Infrared (IR) spectra were recorded using samples prepared as KBr pellets with a Shimadzu FTIR-8400S-spectrometer.  $^{13}\text{CS}_2$  was obtained from Sigma Aldrich and stored over molecular sieves in a glove box under dry argon.

**Crystal Structure Determinations.** Crystals of  $2 \times 4(\text{C}_6\text{H}_6)$  suitable for single crystal analysis were obtained from slow evaporation of a solution of **2** in a 1:2 mixture of  $\text{CD}_2\text{Cl}_2$  and benzene. Data collections were performed at 100 K on a Stoe IPDS 2T diffractometer using  $\text{Mo-K}_\alpha$  radiation ( $\lambda = 0.71073 \text{ \AA}$ ); radiation source was a sealed tube generator with graphite monochromator. Numerical absorption correction based on a Gaussian algorithm was applied, which is implemented in the X-RED program (Stoe, 2002). The structure was solved by direct methods (*SHELXS-97*; G. M. Sheldrick, Program for Crystal Structure Solution, University of Göttingen, 1997) and refined by full matrix least-squares procedures based on  $F^2$  with all measured reflections (*SHELXL-97*; G. M. Sheldrick, Program for Crystal Structure Refinement, University of Göttingen, 1997). All non-hydrogen atoms were refined anisotropically except for five C atoms belonging to tert-butyl groups (C57, C58, C60, C61, C62) involved in disorder modelling. H atoms were introduced in their idealized positions and refined as riding. The crystal structure is a racemic twin; instead of performing a Flack parameter refinement, the twin refinement was done.

**Table S1.** Crystal data and experimental parameters for the crystal structure analysis of **2**.  
 $2 \times 4(\text{C}_6\text{H}_6)$

|                                                                                 |                                                              |
|---------------------------------------------------------------------------------|--------------------------------------------------------------|
| CCDC                                                                            | 817300                                                       |
| Formula                                                                         | $\text{C}_{86}\text{H}_{92}\text{Cu}_2\text{N}_4\text{OS}_2$ |
| weight, $\text{g} \cdot \text{mol}^{-1}$                                        | 1388.90                                                      |
| crystal system                                                                  | orthorhombic                                                 |
| space group                                                                     | <i>Pca</i> 21                                                |
| <i>a</i> , Å                                                                    | 18.4348(10)                                                  |
| <i>b</i> , Å                                                                    | 13.7677(6)                                                   |
| <i>c</i> , Å                                                                    | 28.5655(17)                                                  |
| <i>V</i> , Å <sup>3</sup>                                                       | 7250.1(7)                                                    |
| <i>Z</i>                                                                        | 4                                                            |
| Density, $\text{g} \cdot \text{cm}^{-3}$                                        | 1.272                                                        |
| $\mu(\text{MoK}\alpha)$ , $\text{mm}^{-1}$                                      | 0.694                                                        |
| <i>F</i> (000)                                                                  | 2936                                                         |
| <i>GoF</i>                                                                      | 0.886                                                        |
| $R_{\text{ind}}[I > 2\sigma(I)]$                                                | <i>R</i> 1=0.0528<br><i>wR</i> 2=0.1206                      |
| $R_{\text{ind}}$ (all data)                                                     | <i>R</i> 1=0.0729<br><i>wR</i> 2=0.1295                      |
| $\Delta\rho_{\text{min}} / \Delta\rho_{\text{max}}$ , $\text{e}\text{\AA}^{-3}$ | -0.589 / 0.551                                               |

**Details on Density Functional Calculations.** The molecular structure of **2** as determined by X-ray diffraction analysis was used as starting geometry for the geometry optimisation (any alkyl substituents at the ligand backbone were neglected). The B3LYP functional was employed together with the *6-311G\** basis set. The calculations of the Natural Bond Orbitals as well as the IR spectra were performed on the same level employing NBO version 5.0. The graphical evaluation was carried out using the programs *Gaussview 3.09*, *Diamond 3.0* and *POV-Ray 3.5*.

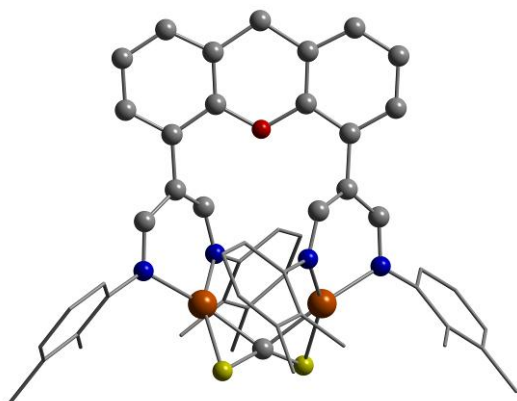

**Figure S2.** Geometry optimized molecular structure of **2** (B3LYP/6-311G\*). Any alkyl substituents at the ligand backbone are omitted.

**Table S3.** Comparison of significant binding parameters of **2** determined by X-ray structure analysis and geometry optimization, respectively.

|         | <b>exp.</b>                            | <b>theo.</b> |
|---------|----------------------------------------|--------------|
| Cu-N/Å  | 1.918(5), 1.941(5), 1.955(5), 1.926(5) | 1.95 / 1.98  |
| Cu-S/Å  | 2.1826(17), 2.1915(17)                 | 2.21         |
| Cu-C/Å  | 2.001(7), 2.029(6)                     | 1.99         |
| C-S/Å   | 1.646(8), 1.668(8)                     | 1.67 / 1.67  |
| S-C-S/° | 147.2(3)                               | 143.9        |

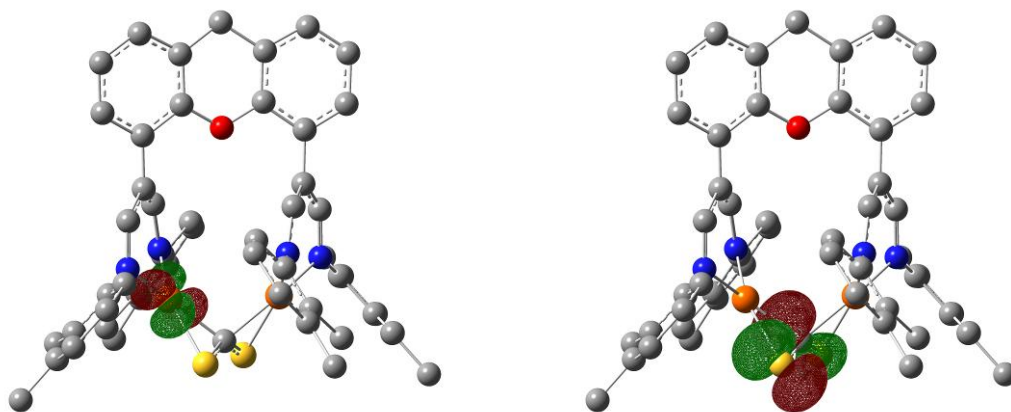

**Figure S4.** Interaction of the Cu d orbital and the C=S  $\pi^*$  orbital.

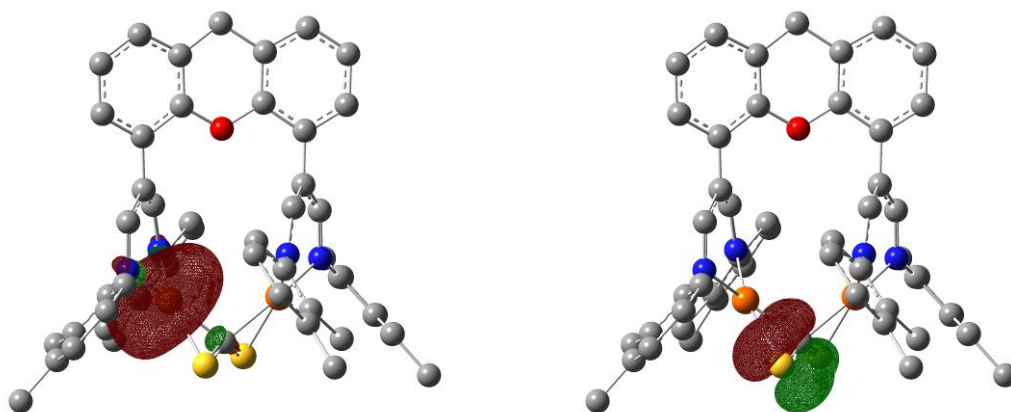

**Figure S5.** Interaction of the Cu s orbital and the C=S  $\pi$  orbital.

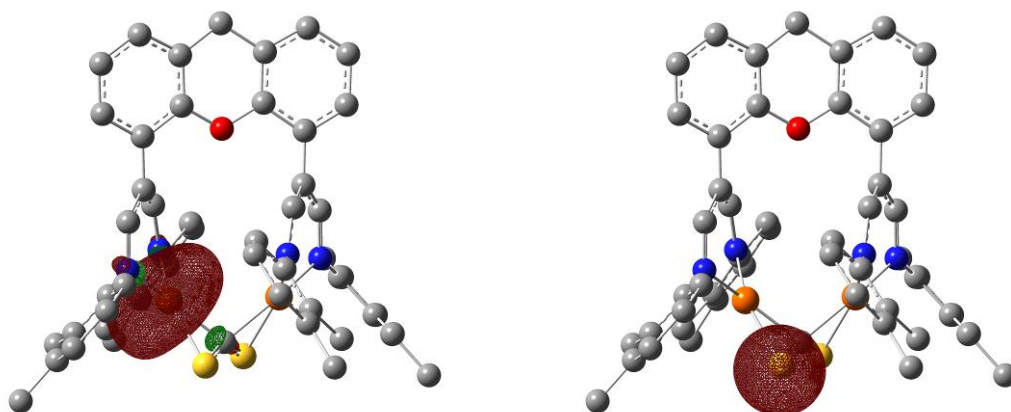

**Figure S6.** Interaction of the Cu s orbital and the S lone pair.
